# Supplementary material for: A New Live Auxotrophic Vaccine Induces Cross-Protection against Klebsiella pneumoniae Infections in Mice
Source: MDPI journal article supplement (doi:10.3390/vaccines10060953), 2022-06-16
Supplement: s1 [file s1]

## A New Live Auxotrophic Vaccine induces Cross-Protection against *Klebsiella pneumoniae* Infections in Mice

Miriam Moscoso, Juan A. Vallejo, Maria P. Cabral, Patricia García, Víctor Fuentes-Valverde, Eva Gato, Jorge Arca-Suárez, Pablo Aja-Macaya and Germán Bou

### Supporting Information

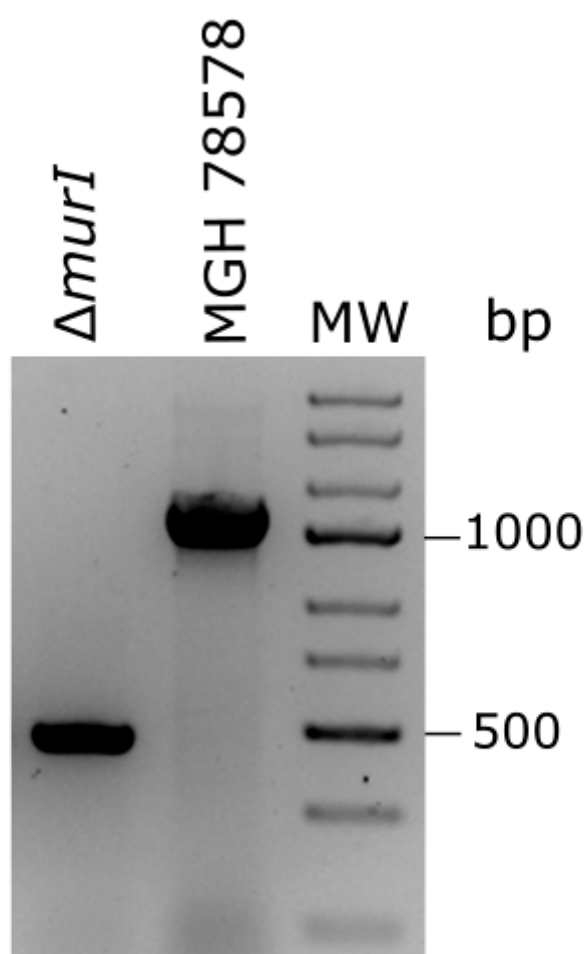

**Figure S1.** PCR confirmation of the deletion in the  $\Delta murI$  mutant of *K. pneumoniae* MGH 78578. Oligonucleotides EXTMURIFW and EXTMURIRV were used to generate fragments with 1,189 bp from the strain carrying the wild-type locus KPN\_04256 (*murI*) or a 470 bp fragment from the strains carrying the  $\Delta murI$  mutant allele. MW, DNA molecular weight (in pb).

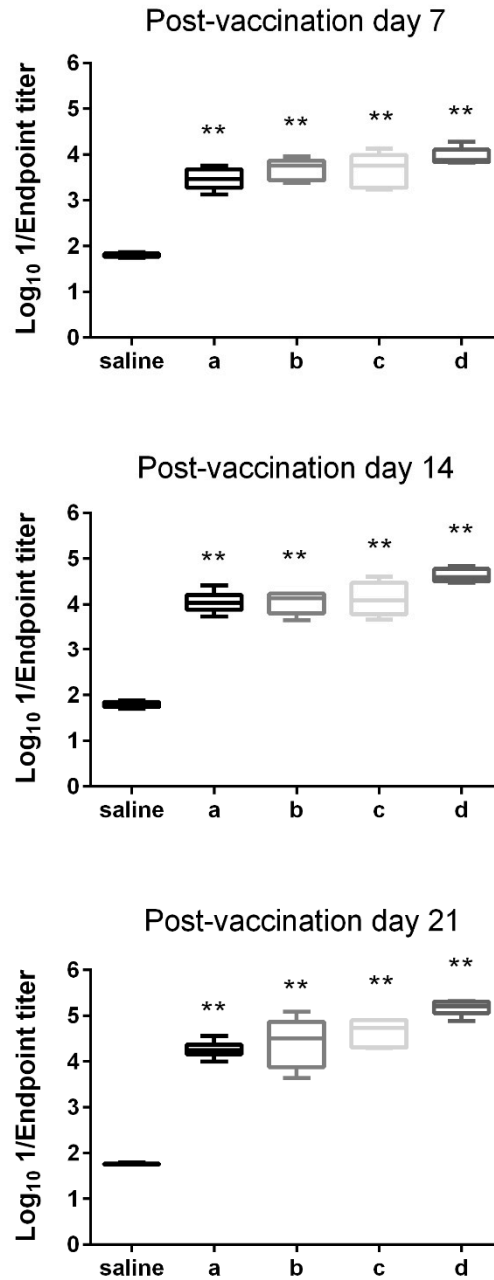

**Figure S2.** Humoral immune response after inoculation.  $\text{Log}_{10}$  1/Endpoint titer of IgG antibodies produced against MGH 78578 in BALB/c mice ( $n = 6$ ) on days 7, 14 (after one immunization) and 21 (two immunizations) post-inoculation with different doses of MGH 78578  $\Delta\text{murI}$  strain:  $7.2 \times 10^4$  CFU (a),  $3.5 \times 10^5$  CFU (b),  $4.9 \times 10^6$  CFU (c) and  $7.9 \times 10^6$  CFU (d), and in the uninoculated control mice (saline control). The antibody titers were determined by indirect ELISA. \* $P < 0.05$  and \*\* $P < 0.005$  (Mann-Whitney  $U$  test).

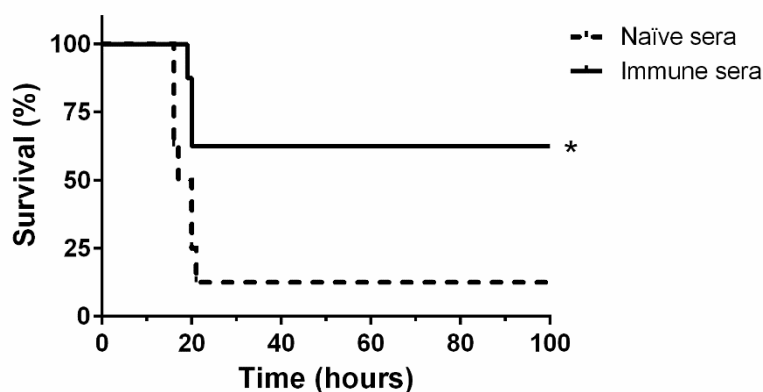

**Figure S3.** Passive anti-Kp sera transfer from immunized mice protects against *K. pneumoniae* infection in naive mice. BALB/c mice ( $n = 8$ ) were administered with antisera (immune or naive serum) 3 hours before challenge with MGH 78578 ( $2.6 \times 10^8$  CFU) and survival was monitored daily for one week.  $*P = 0.0298$ , log-rank test.

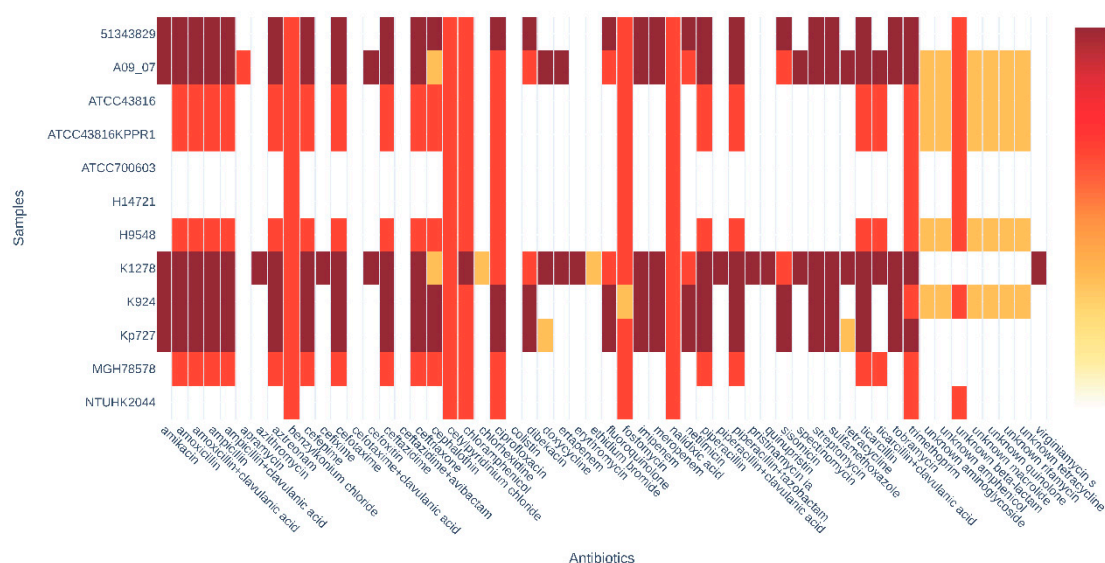

**Figure S4.** Heatmap of in-silico resistances detected using Resfinder. The level of resistance depends on if the genes detected are associated to AMR and on their similarity to the closest reference. White: No resistance detected; Yellow: partial match and length is smaller than reference; Bright red: full match but length is smaller than reference; Dark red: full match and equal length. The Resfinder v4.1 software is available in the Center for Genomic Epidemiology (<https://cge.cbs.dtu.dk/services/ResFinder/>).

**Table S1.** Virulence, serotype, assembly metrics and sequence type (ST) predicted by Kleborate software [1].

| Strain                      | Species                                                                | ST    | Contigs | N50     | GenBank/BioSample<br>Accession No. | Virulence<br>score | wzi    | K locus | K type             | O locus | O type             |
|-----------------------------|------------------------------------------------------------------------|-------|---------|---------|------------------------------------|--------------------|--------|---------|--------------------|---------|--------------------|
| <b>MGH 78578</b>            | <i>Klebsiella pneumoniae</i>                                           | ST38  | 1       | 5315120 | CP000647.1                         | 0                  | wzi50  | KL52    | K52                | OL101   | unknown<br>(OL101) |
| <b>ATCC 43816</b>           | <i>Klebsiella pneumoniae</i>                                           | ST493 | 1       | 5362708 | CP064352.1                         | 1                  | wzi2   | KL2     | K2                 | O1/O2v1 | O1                 |
| <b>ATCC 43816<br/>KPPR1</b> | <i>Klebsiella pneumoniae</i>                                           | ST493 | 1       | 5374834 | CP009208.1                         | 1                  | wzi2   | KL2     | K2                 | O1/O2v1 | O1                 |
| <b>ATCC<br/>700603</b>      | <i>Klebsiella quasipneumoniae</i><br>subsp.<br><i>similipneumoniae</i> | ST489 | 1       | 5284734 | CP014696.2                         | 0                  | wzi171 | KL53    | K53                | O3/O3a  | O3/O3a             |
| <b>H9548</b>                | <i>Klebsiella pneumoniae</i>                                           | ST493 | 46      | 224953  | SAMN28747367                       | 1                  | wzi2   | KL2     | K2                 | O1/O2v1 | O1                 |
| <b>H14721</b>               | <i>Klebsiella pneumoniae</i>                                           | ST23  | 63      | 327040  | SAMN28747366                       | 5                  | wzi1   | KL1     | K1                 | O1/O2v2 | O1                 |
| <b>Kp09107</b>              | <i>Klebsiella pneumoniae</i>                                           | ST101 | 1       | 5588067 |                                    | 1                  | wzi137 | KL17    | K17                | O1/O2v1 | O1                 |
| <b>Kp727</b>                | <i>Klebsiella pneumoniae</i>                                           | ST405 | 1       | 5700855 | SAMEA1877770                       | 1                  | wzi143 | KL151   | unknown<br>(KL151) | O4      | O4                 |
| <b>Kp924</b>                | <i>Klebsiella pneumoniae</i>                                           | ST11  | 1       | 5603904 | SAMEA1877823                       | 1                  | wzi24  | KL24    | K24                | O1/O2v1 | O2a                |
| <b>Kp1278</b>               | <i>Klebsiella pneumoniae</i>                                           | ST15  | 174     | 198944  | SAMEA1920272                       | 0                  | wzi24  | KL24    | K24                | O1/O2v1 | O1                 |
| <b>NTUH-<br/>K2044</b>      | <i>Klebsiella pneumoniae</i>                                           | ST23  | 1       | 5248520 | AP006725.1                         | 1                  | wzi1   | KL1     | K1                 | O1/O2v2 | O1                 |
| <b>51343829</b>             | <i>Klebsiella pneumoniae</i>                                           | ST15  | 105     | 184617  | SAMN28747368                       | 1                  | wzi93  | KL112   | unknown<br>(KL112) | O1/O2v1 | O1                 |

1. Lam, M.M.C., et al., A genomic surveillance framework and genotyping tool for *Klebsiella pneumoniae* and its related species complex. Nat Commun, 2021. **12**(1): p. 4188.

**Table S2.** Chromosomal and acquired antimicrobial resistance (AMR) genes detected by Kleborate’s AMR module.

| Strain                                           | MGH78578               | ATCC43816 | ATCC43816<br>KPPR1 | ATCC700603           | H9548 | H14721                 | Kp09107                                                                         | Kp727                                                                                  | Kp924                                                  | Kp1278                                              | NTUH-K2044             | 51343829                                               |
|--------------------------------------------------|------------------------|-----------|--------------------|----------------------|-------|------------------------|---------------------------------------------------------------------------------|----------------------------------------------------------------------------------------|--------------------------------------------------------|-----------------------------------------------------|------------------------|--------------------------------------------------------|
| <b>Aminoglycoside</b>                            | -                      | -         | -                  | -                    | -     | -                      | aac(3)-IId <sup>^</sup> ;<br>aac(6')-Ib'.v1;<br>aadA*;<br>strA.v1*;<br>strB.v1* | aac(3)-IIa.v1 <sup>^</sup> ;<br>aac(6')-Ib-cr.v2;<br>strA.v1 <sup>^</sup> ;<br>strB.v1 | aac(6')-Ib-cr.v2;<br>strA.v1 <sup>^</sup> ;<br>strB.v1 | aac(6')-Ib'.v1*;<br>aadA*;<br>strA.v1*;<br>strB.v1* | -                      | aac(6')-Ib-cr.v2;<br>strA.v1 <sup>^</sup> ;<br>strB.v1 |
| <b>Colistin</b>                                  | -                      | -         | -                  | -                    | -     | -                      | -                                                                               | -                                                                                      | -                                                      | -                                                   | -                      | -                                                      |
| <b>Fosfomycin</b>                                | -                      | -         | -                  | -                    | -     | -                      | -                                                                               | -                                                                                      | -                                                      | -                                                   | -                      | -                                                      |
| <b>Fluoroquinolone</b>                           | -                      | -         | -                  | -                    | -     | -                      | -                                                                               | qnrB1.v2 <sup>^</sup>                                                                  | qnrB1.v1                                               | -                                                   | -                      | -                                                      |
| <b>Glycopeptide</b>                              | -                      | -         | -                  | -                    | -     | -                      | -                                                                               | -                                                                                      | -                                                      | -                                                   | -                      | -                                                      |
| <b>MLS</b>                                       | -                      | -         | -                  | -                    | -     | -                      | -                                                                               | -                                                                                      | -                                                      | mphE.v2; msrE                                       | -                      | -                                                      |
| <b>Phenicol</b>                                  | -                      | -         | -                  | -                    | -     | -                      | catII.2*                                                                        | CatB4.v1?                                                                              | CatB4.v1;<br>catII.2*                                  | catA1 <sup>^</sup> ; catB2.v1                       | -                      | -                                                      |
| <b>Rifampin</b>                                  | -                      | -         | -                  | -                    | -     | -                      | -                                                                               | -                                                                                      | -                                                      | -                                                   | -                      | -                                                      |
| <b>Sulphonamide</b>                              | -                      | -         | -                  | -                    | -     | -                      | sul2                                                                            | sul2                                                                                   | sul2                                                   | sul1; sul2                                          | -                      | sul2                                                   |
| <b>Tetracycline</b>                              | -                      | -         | -                  | -                    | -     | -                      | tet(D)                                                                          | -                                                                                      | -                                                      | tet(D)                                              | -                      | -                                                      |
| <b>Tigecycline</b>                               | -                      | -         | -                  | -                    | -     | -                      | -                                                                               | -                                                                                      | -                                                      | -                                                   | -                      | -                                                      |
| <b>Trimethoprim</b>                              | -                      | -         | -                  | -                    | -     | -                      | dfrA14.v2*                                                                      | dfrA14.v2*                                                                             | -                                                      | dfrA14.v2*; dfrB1                                   | -                      | dfrA14.v2*                                             |
| <b>Beta-lactamases</b>                           | -                      | -         | -                  | -                    | -     | -                      | OXA-9.v1                                                                        | OXA-1; TEM-1D.v1 <sup>^</sup>                                                          | OXA-1; TEM-1D.v1 <sup>^</sup>                          | OXA-9.v1; SCO-1                                     | -                      | OXA-1; TEM-1D.v1 <sup>^</sup>                          |
| <b>Beta-lactamases with inhibitor resistance</b> | -                      | -         | -                  | -                    | -     | -                      | -                                                                               | -                                                                                      | -                                                      | -                                                   | -                      | -                                                      |
| <b>ESBLs</b>                                     | -                      | -         | -                  | -                    | -     | -                      | CTX-M-15                                                                        | CTX-M-15                                                                               | CTX-M-15                                               | SHV-12                                              | -                      | CTX-M-15                                               |
| <b>ESBLs + inhibitor resistance</b>              | -                      | -         | -                  | -                    | -     | -                      | -                                                                               | -                                                                                      | -                                                      | -                                                   | -                      | -                                                      |
| <b>Carbapenemases</b>                            | -                      | -         | -                  | -                    | -     | -                      | KPC-2                                                                           | OXA-48                                                                                 | OXA-48                                                 | VIM-1                                               | -                      | OXA-48                                                 |
| <b>Chromosomal beta-lactamases</b>               | SHV-11.v1 <sup>^</sup> | SHV-1*    | SHV-1*             | OKP-B-6 <sup>^</sup> | SHV-1 | SHV-11.v1 <sup>^</sup> | SHV-1 <sup>^</sup>                                                              | SHV-76                                                                                 | SHV-11.v1                                              | -                                                   | SHV-11.v1 <sup>^</sup> | SHV-28.v1 <sup>^</sup>                                 |
| <b>SHV mutations</b>                             | 35Q                    | -         | -                  | -                    | -     | 35Q                    | -                                                                               | 35Q                                                                                    | 35Q                                                    | 238S; 240K; 35Q                                     | 35Q                    | -                                                      |
| <b>Omp mutations</b>                             | OmpK35-86%             | -         | -                  | -                    | -     | -                      | OmpK35-61%;<br>OmpK36-66%                                                       | OmpK35-70%                                                                             | -                                                      | OmpK35-64%                                          | -                      | OmpK35-4%;<br>OmpK36-7%                                |
| <b>Col mutations</b>                             | -                      | -         | -                  | -                    | -     | -                      | -                                                                               | -                                                                                      | -                                                      | MgrB-0%                                             | -                      | -                                                      |
| <b>Flq mutations</b>                             | GyrA-83Y               | -         | -                  | -                    | -     | -                      | GyrA-83Y; GyrA-87G; ParC-80I                                                    | -                                                                                      | GyrA-83F; GyrA-87A; ParC-80I                           | GyrA-83F; GyrA-87A; ParC-80I                        | -                      | GyrA-83F; GyrA-87A; ParC-80I                           |

Mutations related to AMR are also represented. Each symbol represents the following: “<sup>^</sup>” means inexact nucleotide but exact amino acid match, “\*” means inexact nucleotide and inexact amino acid match, “?” means incomplete match and “-X%” means truncated amino acid sequence.
